# Supplementary material for: Understanding Patient Experience with Outpatient Cancer Rehabilitation Care
Source: MDPI journal article supplement (doi:10.3390/healthcare11030348), 2023-01-25
Supplement: s1 [file s1]

**Supplement Table S1.** Individual and rehabilitation characteristics of patients who attended outpatient cancer rehabilitation and completed Net Promoter Survey® (NPS) vs. those who did not complete NPS

|                                                 | NPS available<br>(n=383) | NPS unavailable<br>(n=1,018) | Between-group<br>comparison, p-value    |
|-------------------------------------------------|--------------------------|------------------------------|-----------------------------------------|
| Age (Mean ± SD)                                 | 60.51 ± 12.02            | 60.55 ± 13.46                | <i>t</i> [1399] = 0.05, <i>p</i> = 0.96 |
| Sex (N, %)                                      |                          |                              |                                         |
| Female                                          | 323, 84.33%              | 843, 82.81%                  | $\chi^2$ [1] = 0.46, <i>p</i> = 0.50    |
| Male                                            | 60, 15.67%               | 175, 17.19%                  |                                         |
| Cancer type (N, %)                              |                          |                              |                                         |
| Breast                                          | 265, 69.19%              | 623, 61.2%                   | $\chi^2$ [3] = 7.80, <i>p</i> = 0.05    |
| Heme or lymphoid                                | 29, 7.57%                | 98, 9.63%                    |                                         |
| Musculoskeletal                                 | 24, 6.27%                | 74, 7.27%                    |                                         |
| Other                                           | 65, 16.97%               | 223, 21.91%                  |                                         |
| Rehabilitation discipline (N, %)                |                          |                              |                                         |
| PT                                              | 341, 89.03%              | 865, 84.97%                  | $\chi^2$ [1] = 3.84, <i>p</i> = 0.05    |
| OT                                              | 42, 10.97%               | 153, 15.03%                  |                                         |
| Insurance type (N, %)                           |                          |                              |                                         |
| Federally funded insurance                      | 196, 51.17%              | 517, 50.79%                  | $\chi^2$ [2] = 0.36, <i>p</i> = 0.83    |
| Private insurance                               | 179, 46.74%              | 474, 46.56%                  |                                         |
| Other                                           | 8, 2.09%                 | 27, 2.65%                    |                                         |
| Visits attended (Mean ± SD)                     | 14.23 ± 12.37            | 14.71 ± 14.7                 | <i>t</i> [1399] = 0.57, <i>p</i> = 0.57 |
| Weeks attended (Mean ± SD)                      | 11.17 ± 11.25            | 11.99 ± 11.41                | <i>t</i> [1399] = 1.28, <i>p</i> = 0.20 |
| Achieved the MCID on PRO<br>(N, %) <sup>b</sup> | 179, 46.74%              | 481, 47.25%                  | $\chi^2$ [1] = 0.03, <i>p</i> = 0.86    |

\*Between-groups difference, *p* < .05

\*\*Other includes: Brain, Eye, CNS, Colorectal, endocrine and neuroendocrine, gastrointestinal, genitourinary, gynecologic, head and neck, lung and respiratory and skin.
